# Supplementary material for: Chemical Analysis and In Vitro Bioactivity of Essential Oil of Laurelia sempervirens and Safrole Derivatives against Oomycete Fish Pathogens
Source: MDPI journal article supplement (doi:10.3390/molecules26216551), 2021-10-29
Supplement: s1 [file s1]

## SUPPORTING INFORMATION

# Chemical Analysis and *In Vitro* Bioactivity of Essential Oil of *Laurelia sempervirens* and Safrole Derivatives against Oomycete Fish Pathogens

Alejandro Madrid <sup>1, \*</sup>, Ana Lizeth Morales <sup>1</sup>; Valentina Saffirio <sup>1</sup>, Mauricio A. Cuellar <sup>2</sup>, Enrique Werner <sup>3</sup>, Bastián Said <sup>4</sup>, Patricio Godoy <sup>5</sup>, Nelson Caro <sup>6</sup>, Mirna Melo <sup>7</sup> and Iván Montenegro <sup>8\*</sup>

<sup>1</sup> Laboratorio de Productos Naturales y Síntesis Orgánica (LPNSO), Departamento de Ciencias y Geografía, Facultad de Ciencias Naturales y Exactas, Universidad de Playa Ancha, Avda. Leopoldo Carvallo 270, Playa Ancha, Valparaíso 2340000, Chile; [alejandro.madrid@upla.cl](mailto:alejandro.madrid@upla.cl)

<sup>2</sup> Facultad de Farmacia, Escuela de Química y Farmacia, Universidad de Valparaíso, Av. Gran Bretaña 1093, Valparaíso 2340000, Chile; [mauricio.cuellar@uv.cl](mailto:mauricio.cuellar@uv.cl)

<sup>3</sup> Departamento de Ciencias Básicas, Campus Fernando May, Universidad del Bío-Bío. Avda. Andrés Bello 720, casilla 447, Chillán 3780000, Chile; [ewerner@ubiobio.cl](mailto:ewerner@ubiobio.cl)

<sup>4</sup> Departamento de Química, Universidad Técnica Federico Santa María, Av. Santa María 6400, Vitacura 7630000, Santiago, Chile; [bastian.said@usm.cl](mailto:bastian.said@usm.cl)

<sup>5</sup> Instituto de Microbiología Clínica, Facultad de Medicina, Universidad Austral de Chile, Los Laureles s/n, Isla Teja, Valdivia 5090000, Chile; E-Mails: patricio.godoy@uach.cl

<sup>6</sup> Centro de Investigación Austral Biotech, Facultad de Ciencias, Universidad Santo Tomás, Avda. Ejército 146, Santiago 8320000, Chile; [ncaro@australbiotech.cl](mailto:ncaro@australbiotech.cl)

<sup>7</sup> Instituto de Química, Facultad de Ciencias, Pontificia Universidad Católica de Valparaíso, Av. Universidad #330, Curauma, Valparaíso 2340000, Chile; [mirna.melo.f@mail.pucv.cl](mailto:mirna.melo.f@mail.pucv.cl)

<sup>8</sup> Escuela de Obstetricia y Puericultura, Facultad de medicina, Universidad de Valparaíso, Angamos 655, Reñaca, Viña del Mar 2520000, Chile; [ivan.montenegro@uv.cl](mailto:ivan.montenegro@uv.cl)

\* Correspondence: [alejandro.madrid@upla.cl](mailto:alejandro.madrid@upla.cl); Tel.: +56-032-250-0526 (A.M.)

## NMR data for safrole and its derivatives

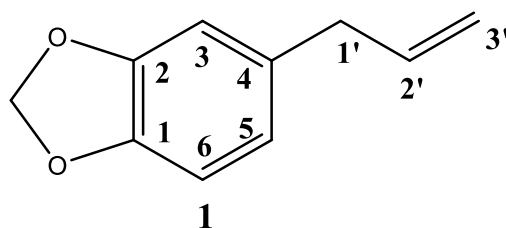

Figure S1. Safrole (1) numbered structure.

**Compound 1:**  $^1\text{H}$  NMR: 6.73 (d, 1H,  $J=7.6$  Hz, H-6); 6.69 (d, 1H,  $J=1.4$  Hz, H-3); 6.64 (dd, 1H,  $J=1.4$  and  $J=7.6$  Hz, H-5); 5.91 (s, 2H,  $\text{OCH}_2\text{O}$ ); 5.95 (ddt, 1H,  $J=17.0$ ; 10.3 and 6.5 Hz, H-2'); 5.10 (m, 2H, H-3'); 3.65 (d, 2H,  $J=4.0$  Hz, H-1').  $^{13}\text{C}$  NMR: 147.5 (C-2); 145.6 (C-1); 135.6 (C-4); 135.2 (C-2'); 121.1 (C-5); 117.0 (C-3'); 110.4 (C-3); 105.7 ( $\text{OCH}_2\text{O}$ ); 102.7 (C-6); 37.6 (C-1').

**Compound 4:**  $^1\text{H}$  NMR: 6.73 (d, 1H,  $J=7.6$  Hz, H-6); 6.69 (d, 1H,  $J=1.4$  Hz, H-3); 6.64 (dd, 1H,  $J=1.4$  and  $J=7.6$  Hz, H-5); 5.91 (s, 2H,  $\text{OCH}_2\text{O}$ ); 3.65 (t, 2H,  $J=6.4$  Hz, H-3'); 2.62 (t, 2H,  $J=7.4$  Hz, H-1'); 1.84 (dt, 2H,  $J=6.4$  and  $J=15.2$  Hz, H-2'); 1.56 (b.s., 1H, OH).  $^{13}\text{C}$  NMR: 147.5 (C-2); 145.6 (C-1); 135.6 (C-4); 121.1 (C-5); 108.8 (C-6); 108.1 (C-3); 100.7 ( $\text{OCH}_2\text{O}$ ); 62.1 (C-3'); 34.4 (C-1'); 31.7 (C-2').

**Compound 5:**  $^1\text{H}$  NMR: 7.08 (m, 2H, H-3 and H-6); 7.00 (dd, 1H,  $J=8.7$  and  $J=1.5$  Hz, H-5); 5.93 (ddt, 1H,  $J=16.8$ ; 10.1 and 6.8 Hz, H-2'); 5.12 (dd, 1H,  $J=6.3$  and  $J=1.3$  Hz, H-3' $\alpha$ ); 5.09 (t, 1H,  $J=1.3$  Hz, H-3' $\beta$ ); 3.38 (d, 2H,  $J=6.8$  Hz, H-1'); 2.28 (s, 6H,  $\text{CH}_3\text{CO}$ ).  $^{13}\text{C}$  NMR: 168.4 ( $\text{CH}_3\text{C=O}$ ); 168.3 ( $\text{CH}_3\text{C=O}$ ); 141.8 (C-4); 140.2 (C-2); 138.9 (C-1); 136.4 (C-2'); 126.6 (C-5); 123.3 (C-3); 123.1 (C-6); 116.6 (C-3'); 39.4 (C-1'); 20.6 ( $2\times\text{CH}_3\text{CO}$ ).

**Compound 6:**  $^1\text{H}$  NMR: 7.49 (s, 1H, H-6); 6.76 (s, 1H, H-3); 6.09 (s, 2H,  $\text{OCH}_2\text{O}$ ); 5.95 (ddt, 1H, 1H,  $J=17.0$ , 10.3 and 6.5 Hz, H-2'); 5.10 (m, 2H, H-3'); 3.65 (d, 2H,  $J=4.0$  Hz, H-1').  $^{13}\text{C}$  NMR: 151.7 (C-2); 146.5 (C-5 and C-1); 135.2 (C-2'); 132.2 (C-4); 117.0 (C-3'); 110.4 (C-3); 105.7 ( $\text{OCH}_2\text{O}$ ); 102.7 (C-6); 37.6 (C-1').

**Compound 7:**  $^1\text{H}$  NMR: 7.46 (s, 1H, H-6); 6.76 (s, 1H, H-3); 6.08 (s, 2H,  $\text{OCH}_2\text{O}$ ); 3.71 (t, 2H,  $J=6.2$  Hz, H-3'); 2.96 (dd, 2H,  $J=6.4$  and  $J=8.6$  Hz, H-1'); 1.90 (m, 2H, H-2') 1.50 (b.s., 1H, OH).  $^{13}\text{C}$  NMR: 151.7 (C-2); 146.3 (C-1); 142.8 (C-5); 134.4 (C-4); 110.6 (C-3); 105.7 (C-6); 102.7 ( $\text{OCH}_2\text{O}$ ); 62.0 (C-3'); 33.4 (C-2'); 30.1 (C-1').

**Compound 8:**  $^1\text{H}$  NMR: 7.43 (s, 1H, H-6); 6.69 (s, 1H, H-3); 6.05 (s, 2H,  $\text{OCH}_2\text{O}$ ); 4.07 (t, 2H,  $J=6.3$  Hz, H-3'); 2.89 (m, 2H, H-1'); 2.03 (s, 3H,  $\text{CH}_3$ ); 1.93 (m, 2H, H-2').  $^{13}\text{C}$  NMR: 170.4 ( $\text{CH}_3\text{C=O}$ ); 151.6 (C-2); 146.3 (C-1); 142.6 (C-5); 133.5 (C-4); 110.6 (C-3); 105.6 ( $\text{OCH}_2\text{O}$ ); 102.7 (C-6); 63.4 (C-3'); 30.5 (C-2'); 29.3 (C-1'); 20.8 ( $\text{CH}_3\text{CO}$ ).

**Compound 9:**  $^1\text{H}$ -NMR: 6.78 (d, 1H,  $J=8.0$  Hz, H-6); 6.71 (d, 1H,  $J=1.9$  Hz, H-3); 6.62 (dd, 1H,  $J=8.0$ , 1.9 Hz, H-5); 5.93 (ddt, 1H,  $J=16.9$ , 10.2 and 6.8 Hz, H-2'); 5.29 (b.s., 1H, OH); 5.21 (b.s., 1H, OH); 5.05 (m, 2H, H-3'); 3.27 (d, 2H,  $J=6.7$  Hz, H-1').  $^{13}\text{C}$ -NMR: 143.5 (C-2); 141.7 (C-1); 137.6 (C-2'); 133.2 (C-4); 121.0 (C-5); 115.7 (C-6); 115.6 (C-3); 115.3 (C-3'); 39.5 (C-1').

**Compound 10:**  $^1\text{H}$ -NMR: 6.78 (d, 1H,  $J=8.0$  Hz, H-6); 6.71 (d, 1H,  $J=1.9$  Hz, H-3); 6.62 (dd, 1H,  $J=8.0$ , 1.9 Hz, H-5); 5.93 (ddt, 1H,  $J=16.9$ , 10.2 and 6.8 Hz, H-2'); 5.29 (b.s., 1H, OH); 5.21 (b.s., 1H, OH); 5.05 (m, 2H, H-3'); 3.27 (d, 2H,  $J=6.7$  Hz, H-1').  $^{13}\text{C}$ -NMR: 143.5 (C-2); 141.7 (C-1); 137.6 (C-2'); 133.2 (C-4); 121.0 (C-5); 115.7 (C-6); 115.6 (C-3); 115.3 (C-3'); 39.4 (C-1'); 20.6 ( $2\times\text{CH}_3\text{CO}$ ).

**Compound 11:**  $^1\text{H}$ -NMR: 7.75 (s, 1H, OH); 7.73 (s, 1H, OH); 5.69 (b.s, 1H, OH); 6.68 (m, 2H, H-3 and H-6); 6.51 (dd, 1H,  $J=8.1$  and  $J=1.8$  Hz, H-5); 3.56 (t, 2H,  $J=6.5$  Hz, H-3'); 2.52 (t, 2H,  $J=7.7$  Hz, H-

1'); 1.75 (m, 2H, H-2'). <sup>13</sup> C-NMR: 145.2 (C-2); 144.6 (C-1); 134.7 (C-4); 120.3 (C-5); 117.2 (C-6); 116.1 (C-3); 63.1 (C-3'); 32.1 (C-2'); 30.4 (C-1').

**Compound 12:** <sup>1</sup> H-NMR: 7.08 (m, 2H, H-5 and H-6); 7.01 (s, 1H, H-3); 4.10 (t, 2H, J = 6.5 Hz, H-3'); 2.68 (t, 2H, J = 7.8 Hz, H-1'); 2.26 (s, 6H, CH<sub>3</sub>CO); 2.05 (s, 3H, CH<sub>3</sub>CO); 1.98 (m, 2H, H-2'). <sup>13</sup> C-NMR: 171.1 (CH<sub>3</sub>CO); 168.4 (CH<sub>3</sub>CO); 168.3 (CH<sub>3</sub>CO); 141.9 (C-2); 140.2 (C-1); 140.1 (C-4); 126.5 (C-5); 123.2 (C-3); 123.1 (C-6); 63.6 (C-3'); 31.6 (C-2'); 29.9 (C-1'); 20.9 (OCH<sub>3</sub>); 20.6 (2 × OCH<sub>3</sub>).
